# Supplementary material for: AuAg@CdS double-walled nanotubes: synthesis and nonlinear absorption properties
Source: Royal Society of Chemistry journal article supplement (doi:10.1039/c7nr02861j), 2017-01-01
Supplement: c7nr02861j1.pdf [file c7nr02861j1.pdf]

# Electronic Supplementary Information

## **AuAg@CdS double-walled nanotubes: Synthesis and nonlinear absorption properties**

Shundong Guan,<sup>a,b</sup> Xiuli Fu,<sup>\*a</sup> Ying Tang,<sup>a,b</sup> and Zhijian Peng<sup>\*b</sup>

<sup>a</sup> *State Key Laboratory of Information Photonics and Optical Communications, and School of Science, Beijing*

*University of Posts and Telecommunications, Beijing 100876, P. R. China*

<sup>b</sup> *School of Engineering and Technology, China University of Geosciences, Beijing 100083, P. R. China*

<sup>a</sup>*xiulifu@bupt.edu.cn;* <sup>b</sup>*pengzhijian@cugb.edu.cn*

Financial support from the National Natural Science Foundation of China (grant nos. 11674035, 11274052 and 61274015), and Fund of State Key Laboratory of Information Photonics and Optical Communications (Beijing University of Posts and Telecommunications) is gratefully acknowledged.

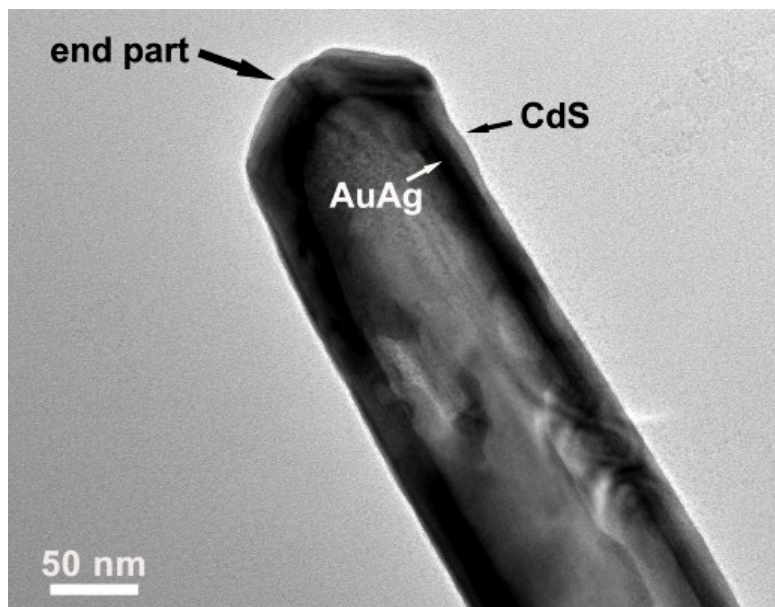

**Fig. S1** Bright-field TEM image taken at the end part of an individual AuAg@CdS DWNT. The result indicates that the end parts of AuAg@CdS DWNTs are closed.

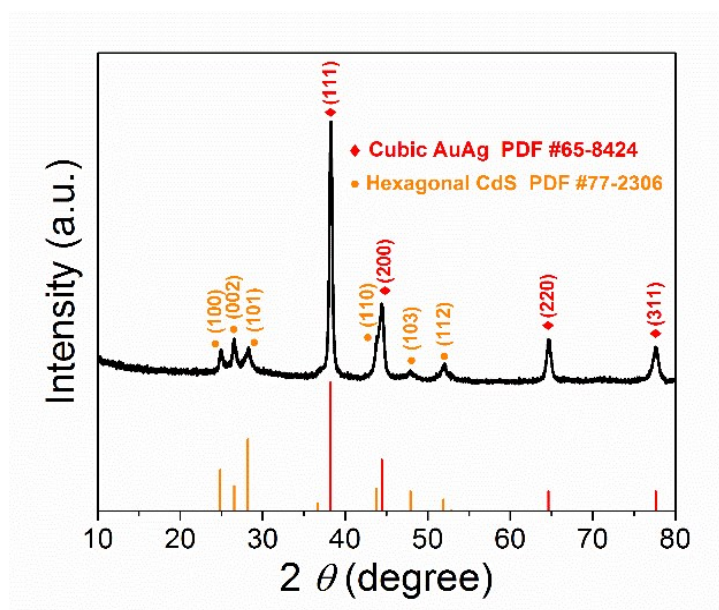

**Fig. S2** XRD pattern of AuAg@CdS DWNTs. The result indicates that the products consist of face-centered cubic (fcc) AuAg alloy and hexagonal CdS without any other components.

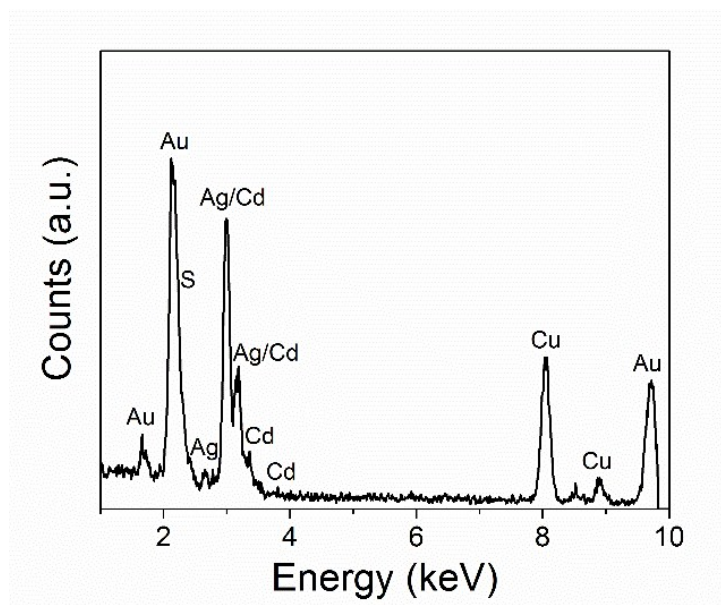

**Fig. S3** EDX spectrum of an individual AuAg@CdS DWNT. This result indicates the presence of Au, Ag, Cd, and S elements in the DWNTs.

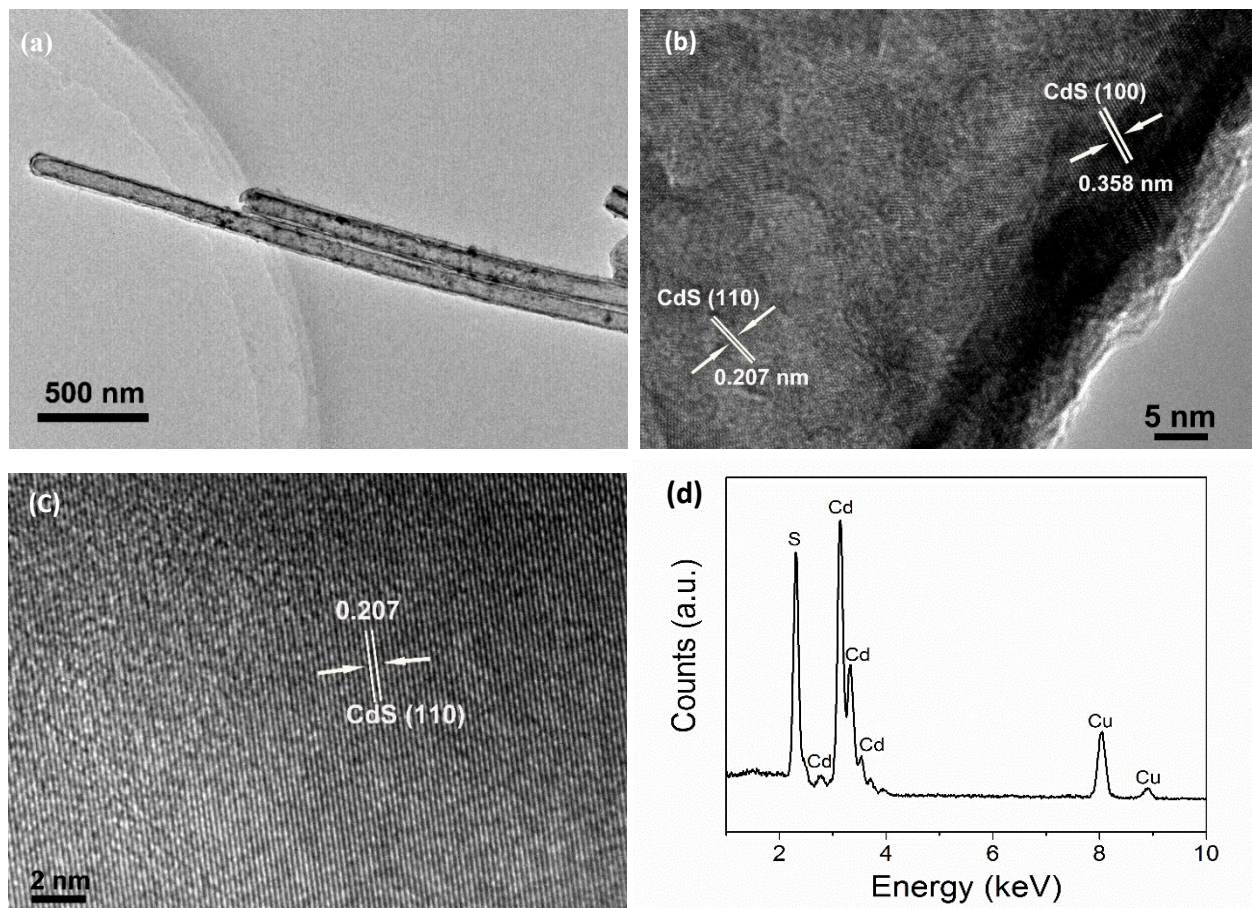

**Fig. S4** TEM results on the CdS NTs after de-alloying of AuAg@CdS DWNTs. (a) Typical bright-field TEM image of CdS NTs. (b) and (c) HRTEM image taken from the edge and central regions of individual CdS NT, respectively. (d) Typical EDX spectrum of an individual CdS NT. The results indicate that the obtained CdS NTs have well maintained hollow tube-like structure like AuAg@CdS DWNTs, but have no remaining Au and Ag elements in them.
